# Supplementary material for: A multiproxy approach to understanding the "enhanced" flux of organic matter through the oxygen-deficient waters of the Arabian Sea
Source: Copernicus journal article supplement (doi:10.5194/bg-13-2077-2016), 2016-04-08
Supplement: Supplementary file 1 [file bg-13-2077-2016-supplement.pdf]

Supplement of Biogeosciences, 13, 2077–2092, 2016  
<http://www.biogeosciences.net/13/2077/2016/>  
doi:10.5194/bg-13-2077-2016-supplement  
© Author(s) 2016. CC Attribution 3.0 License.

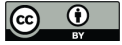

*Supplement of*

## **A multiproxy approach to understanding the “enhanced” flux of organic matter through the oxygen-deficient waters of the Arabian Sea**

**Richard G. Keil et al.**

*Correspondence to:* Richard G. Keil (rickkeil@uw.edu)

The copyright of individual parts of the supplement might differ from the CC-BY 3.0 licence.

1 **Table S1.** Amino acid multiple reaction monitoring transitions (MRM) and the transitions for the  
 2 isotopically-labelled internal standards used for amino acid quantification. RT is retention time in  
 3 minutes. Amino Acid\* designates isotopically-labelled amino acid.

| Amino Acid    | MW<br>g/mol | MRM       | RT<br>(min) | Amino Acid*    | MRM<br>transition    | Isotopic<br>labeling |
|---------------|-------------|-----------|-------------|----------------|----------------------|----------------------|
| Alanine       | 89.09       | 90 → 44   | 3.5         | Alanine*       | 93 → 46              | D <sup>3</sup>       |
| Arginine      | 174.2       | 175 → 70  | 7.5         | Arginine*      | 182 → 76             | D <sup>7</sup>       |
| Aspartate     | 133.1       | 134 → 74  | 2.7         | Aspartate*     | 137 → 74<br>137 → 90 | D <sup>3</sup>       |
| Glutamate     | 147.13      | 148 → 84  | 3.4         | Glutamate*     | 151 → 87             | D <sup>3</sup>       |
| Glycine       | 75.07       | 76 → 30   | 2.9         | Glycine*       | 78 → 31              | D <sup>2</sup>       |
| Histidine     | 155.15      | 156 →     | 5.6         | Histidine*     | 157 → 111            | -                    |
| Isoleucine    | 131.17      | 132 → 86  | 9.1         | Isoleucine*    | 133 → 86             | N <sup>15</sup>      |
| Leucine       | 131.17      | 132 → 86  | 9.5         | Leucine*       | -                    | -                    |
| Lysine        | 146.19      | 147 → 84  | 6.4         | Lysine*        | 151 → 87             | D <sup>4</sup>       |
| Methionine    | 149.2       | 150 → 104 | 7.5         | Methionine*    | 153 → 106            | D <sup>3</sup>       |
| Phenylalanine | 165.49      | 166 → 120 | 10.3        | Phenylalanine* | 174 → 128            | D <sup>8</sup>       |
| Proline       | 115.13      | 116 → 70  | 4.4         | Proline*       | 123 → 76             | D <sup>7</sup>       |
| Serine        | 105.09      | 106 → 60  | 2.8         | Serine*        | 109 → 62             | D <sup>3</sup>       |
| Threonine     | 119.12      | 120 →     | 10.3        | Threonine*     | 121 → 74             | N <sup>15</sup>      |
| Tryptophan    | 204.23      | 205 → 188 | -           | -              | -                    | -                    |
| Tyrosine      | 181.19      | 182 → 136 | 8.2         | Tyrosine*      | 184 → ?              | D <sup>2</sup>       |
| Valine        | 117.15      | 118 → 72  | 7.0         | Valine*        | 126 → 79 (or 80)     | D <sup>8</sup>       |

1 **Table S2.** Targeted peptidomic peptides and associated proteins.

| <b>Peptide Name</b>                     | <b>Process</b>   | <b>Sequence (N- to C-Term)</b> |
|-----------------------------------------|------------------|--------------------------------|
| Hydrazine Hydrolase 1a                  | anammox          | ITFGDRK                        |
| Hydrazine Hydrolase 1b                  | anammox          | FLTQDER                        |
| Hydrazine Hydrolase 1c                  | anammox          | WINTFTAGK                      |
| Hydrazine Hydrolase 1d                  | anammox          | SSSNSGTAFQQR                   |
| Hydrazine Hydrolase 2a                  | anammox          | DPGFVFR                        |
| Hydrazine Hydrolase 2b                  | anammox          | EFDTPTLR                       |
| Hydrazine Hydrolase 2c                  | anammox          | ALEFTGSPFR                     |
| Hydrazine Hydrolase 2d                  | anammox          | NADGSLTEAQKR                   |
| Hydrazine Hydrolase 3a                  | anammox          | VGDWPSGIK                      |
| Hydrazine Hydrolase 3b                  | anammox          | SIYTSYDGPGR                    |
| Hydroxylamine Oxidoreductase 1a         | anammox          | YRETFK                         |
| Hydroxylamine Oxidoreductase 1b         | anammox          | TGESGEFR                       |
| Hydroxylamine Oxidoreductase 1c         | anammox          | DEVSRSPNIK                     |
| Hydroxylamine Oxidoreductase 1d         | anammox          | ENLQAMDESVK                    |
| N2O Reductase 1                         | denitrification  | VLGVPSMR                       |
| N2O Reductase 2                         | denitrification  | ILGIPSMR                       |
| N2O Reductase 3                         | denitrification  | GNAYTTLFIDSQVVK                |
| Cytochrome c nitrite reductase (nrfA) 1 | dnra             | SPDVPR                         |
| Cytochrome c nitrite reductase (nrfA) 2 | dnra             | SPDVAR                         |
| Cytochrome c nitrite reductase (nrfA) 3 | dnra             | AQEALGMDMEK                    |
| Histone H4 1                            | diatom marker    | ISGLIYEETR                     |
| Histone H4 2                            | diatom marker    | DNIQGITKPAIR                   |
| ABC Transporter 1                       | bacterial marker | AVAAAVLGDANK                   |
| ABC Transporter 2                       | bacterial marker | DSGITSTSQFK                    |
